# Supplementary material for: Superhydrophobic PDMS-pCA@CNWF Composite with UV-Resistant and Self-Cleaning Properties for Oil/Water Separation
Source: MDPI journal article supplement (doi:10.3390/ma15010376), 2022-01-05
Supplement: s1 [file s1]

Supplementary Material

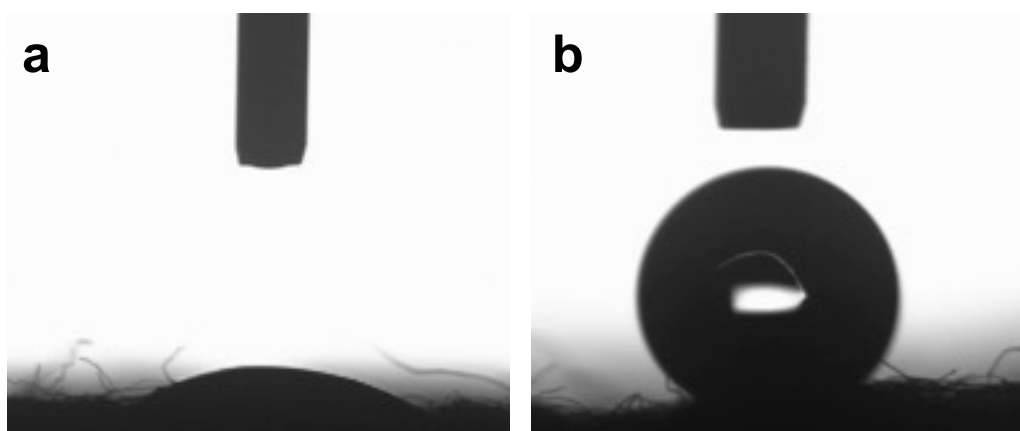

**Figure S1.** Water contact angles of CNWF (a) and PDMS-pCA@CNWF (b).

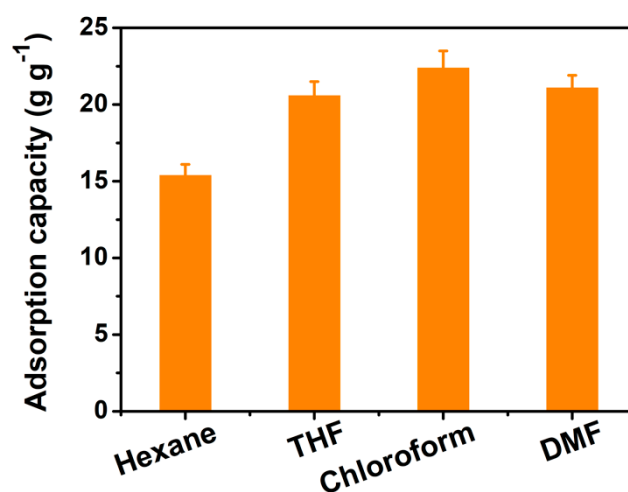

**Figure S2.** Adsorption capacities of PDMS-pCA@CNWF for different oil solvents.

**Table S1.** Summary of the oil adsorption capacities of various adsorbents.

| Samples                                                     | Oil Adsorption Capacity (g/g) | Ref.      |
|-------------------------------------------------------------|-------------------------------|-----------|
| Polydivinylbenzene nanofibres                               | 7.5                           | [1]       |
| Alkenylsuccinic anhydride modified wood-based fibers        | 6                             | [2]       |
| Cotton fibers grafted with dialkyl substituted silyl ethers | 18                            | [3]       |
| Polyvinyl alcohol nanofiber membranes                       | 12.7                          | [4]       |
| Raw cotton fiber                                            | 15                            | [5]       |
| PDMS-pCA@CNWF                                               | 22.4                          | This work |

**Table S2.** Thickness of CNWF, pCA@CNWF, PDMS-pCA@CNWF, and PDMS-pCA@CNWF in the different pH solutions (pH 1, 5, 7, 9, and 13) and various organic solvents (Hexane, THF, Chloroform, and DMF).

| Samples                    | Thickness <sup>a</sup> (μm) |
|----------------------------|-----------------------------|
| CNWF                       | 1066 ± 2.1                  |
| pCA@CNWF                   | 1059 ± 3.0                  |
| PDMS-pCA@CNWF              | 1068 ± 3.5                  |
| PDMS-pCA@CNWF (Hexane)     | 1027 ± 3.8                  |
| PDMS-pCA@CNWF (THF)        | 1049 ± 4.1                  |
| PDMS-pCA@CNWF (Chloroform) | 1058 ± 2.1                  |
| PDMS-pCA@CNWF (DMF)        | 1056 ± 2.3                  |
| PDMS-pCA@CNWF (pH 1)       | 1051 ± 2.5                  |
| PDMS-pCA@CNWF (pH 5)       | 1055 ± 2.6                  |
| PDMS-pCA@CNWF (pH 7)       | 1049 ± 2.7                  |
| PDMS-pCA@CNWF (pH 9)       | 887 ± 3.1                   |
| PDMS-pCA@CNWF (pH 13)      | 721 ± 4.6                   |

<sup>a</sup>Values are shown as the mean ± standard deviation (SD) (n = 3).

## References

1. Zhu, X.; Wang, X.; Liu, Y. Efficient adsorption of oil in water by hydrophobic nonwoven fabrics coated with cross-linked poly-divinylbenzene fibers. *J. Chem. Technol. Biotechnol.* **2019**, *94*, 128–135.
2. Payne, K.; Jackson, C.; Aizpurua, C. Oil spills abatement: Factors affecting oil uptake by cellulosic fibers. *Environ. Sci. Technol.* **2012**, *46*, 7725–7730.
3. Jarrah, K.; Hisaindee, S.; Al-Sayah, M. Preparation of oil sorbents by solvent-free grafting of cellulose cotton fibers. *Cellulose*, **2018**, *25*, 4093–4106.
4. Ge, J.; Wu, G.; Yoon, S. Study on the Preparation and Lipophilic Properties of Polyvinyl Alcohol (PVA) Nanofiber Membranes via Green Electrospinning. *Nanomaterials*, **2021**, *11*, 2514.
5. Liu, F.; Ma, M.; Zang, D. Fabrication of superhydrophobic/superoleophilic cotton for application in the field of water/oil separation. *Carbohydr. Polym.* **2014**, *103*, 480–487.
